# Supplementary material for: Economic Implications of Renewable Energy Adoption in Logistics and Its Impact on Transportation Costs and Food Price Inflation
Source: Research Square preprint supplement (doi:10.21203/rs.3.rs-7549450/v1), 2025-10-27
Supplement: Supplementary file 1 [file 6797c081bf086953e6dff282.docx]

**Dataset Structure & Variables**

- **Renewable Energy Adoption (%):** Ministry of Power, Central Electricity Authority (CEA), BP Statistical Review of World Energy.
- **Logistics Cost (Index):** Transport and logistics cost indices from the Ministry of Statistics and Programme Implementation (MoSPI), or derived from national accounts.
- **Food CPI:** Ministry of Statistics and Programme Implementation (MoSPI), Reserve Bank of India (RBI).
- **Oil Prices (USD/barrel):** World Bank, IMF, or Brent crude prices.
- **Government Policies (Subsidy Index):** Constructed by the authors based on data from the Ministry of New and Renewable Energy (MNRE) on subsidy outlays.
- **GDP Growth Rate (%):** World Bank, IMF, MoSPI.
- **Exchange Rate (INR/USD):** Reserve Bank of India (RBI).

**Dataset (Annual Data for India, 2005-2022)**

| Year | Renewable Adoption (%) | Logistics Cost Index | Food CPI (Base Year) | Oil Price (USD/barrel) | Govt. Subsidy Index | GDP Growth (%) | Exchange Rate (INR/USD) |
| --- | --- | --- | --- | --- | --- | --- | --- |
| 2005 | 1.2 | 85 | 90 | 54.5 | 20 | 9.0 | 44.1 |
| 2006 | 1.5 | 88 | 94 | 65.1 | 22 | 9.6 | 45.3 |
| 2007 | 1.8 | 92 | 102 | 72.4 | 25 | 9.8 | 41.4 |
| 2008 | 2.1 | 105 | 118 | 97.0 | 28 | 3.1 | 43.5 |
| 2009 | 2.5 | 98 | 126 | 61.7 | 35 | 7.9 | 48.4 |
| 2010 | 2.8 | 102 | 132 | 79.5 | 40 | 8.5 | 45.7 |
| 2011 | 3.2 | 110 | 142 | 111.3 | 45 | 5.2 | 46.7 |
| 2012 | 3.5 | 115 | 152 | 111.7 | 48 | 5.5 | 54.4 |
| 2013 | 3.8 | 122 | 166 | 108.8 | 52 | 6.4 | 58.6 |
| 2014 | 4.2 | 118 | 174 | 98.9 | 58 | 7.4 | 61.0 |
| 2015 | 4.5 | 115 | 182 | 52.3 | 65 | 8.0 | 64.2 |
| 2016 | 4.9 | 120 | 189 | 43.7 | 70 | 8.3 | 67.2 |
| 2017 | 5.3 | 125 | 192 | 54.2 | 75 | 6.8 | 65.0 |
| 2018 | 5.7 | 132 | 198 | 71.3 | 78 | 6.5 | 68.4 |
| 2019 | 6.0 | 138 | 208 | 64.0 | 82 | 3.9 | 70.4 |
| 2020 | 6.4 | 145 | 220 | 41.7 | 90 | -5.8 | 73.5 |
| 2021 | 6.8 | 155 | 235 | 70.9 | 95 | 9.1 | 74.1 |
| 2022 | 7.2 | 165 | 250 | 100.8 | 100 | 7.2 | 79.0 |
